# Supplementary material for: A hybrid proteolytic and antibacterial bifunctional film based on amphiphilic carbonaceous conjugates of trypsin and vancomycin
Source: Royal Society of Chemistry journal article supplement (doi:10.1039/c3tb21641a), 2013-12-23
Supplement: c3tb21641a.pdf [file c3tb21641a.pdf]

## Supporting information

for

### **A hybrid proteolytic and antibacterial bifunctional film based on amphiphilic carbonaceous conjugates of trypsin and vancomycin**

Qiang Wu, <sup>\*a</sup> Qiaofang Qi,<sup>a</sup> Chao Zhao,<sup>a</sup> Chaoqun Liu,<sup>a</sup> Luna Fan,<sup>a</sup> Wenzong Zhang,<sup>b</sup> Jiahua Shi,<sup>\*c</sup> and Dongjie Guo<sup>d</sup>

<sup>a</sup> *College of Pharmacy, Institute of Environment and Medicine, Henan University, Kaifeng, 475004, P.R. China. E-mail: henuwuqiang@henu.edu.cn*

<sup>b</sup> *Laboratory of Cell Imaging, Henan University of Traditional Chinese Medicine, Zhengzhou, 450002, P.R. China. E-mail: zhangwenzong601@163.com*

<sup>c</sup> *Key Laboratory of Natural Medicine and Immuno-Engineering of Henan Province, Henan University, Kaifeng, 475004, P.R. China. E-mail: sjiahua@henu.edu.cn*

<sup>d</sup> *State Laboratory of Surface & Interface, Zhengzhou University of Light Industry, Zhengzhou, 450002, P.R. China. E-mail: djguo@nuaa.edu.cn*

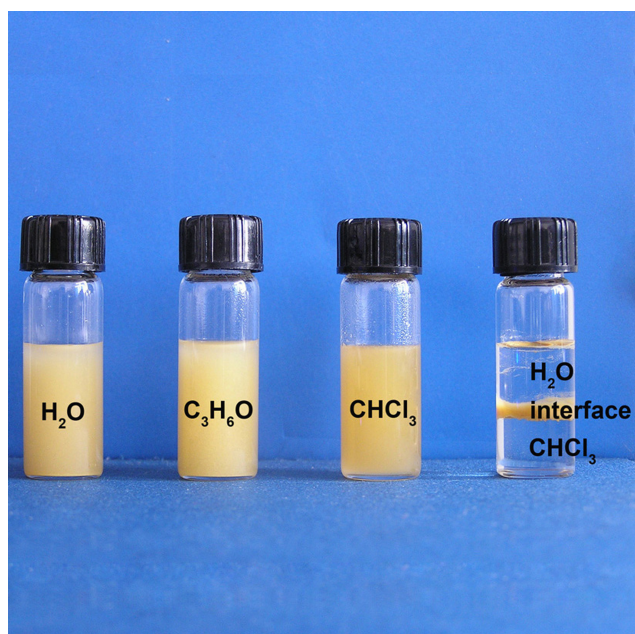

Fig. S1 Photographs of ECD-ACPs dispersed in solvents of different polarities.

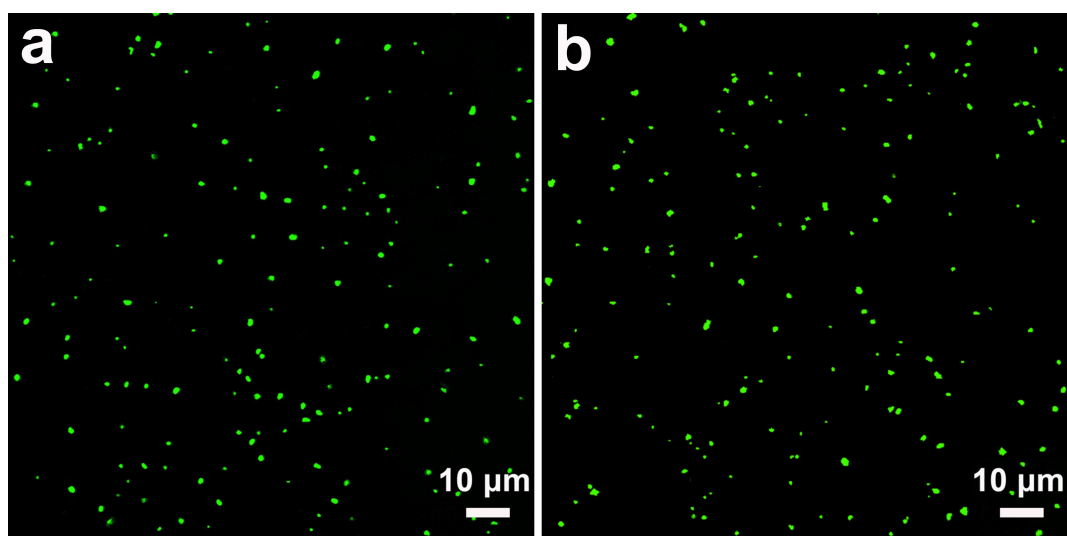

Fig. S2 Fluorescence images of ECD-ACPs particles after their reaction with FITC-labeled (a) Tryp and (b) Van.

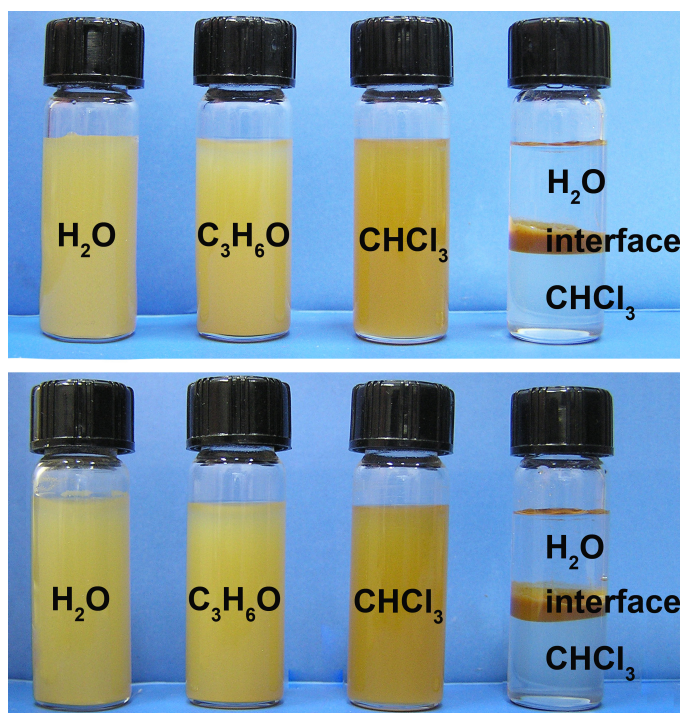

Fig. S3 Photographs of ACPs-Tryp (top) and ACPs-Van (bottom) dispersed in solvents of different polarities.

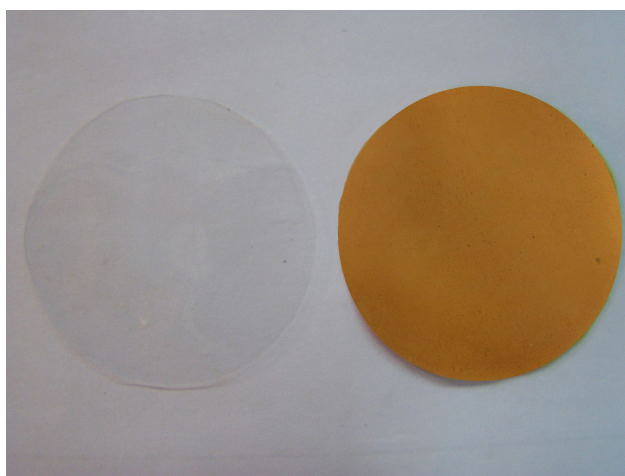

Fig. S4 Photograph of films: blank PMMA (left) and PMMA/ACPs-Tryp/ACPs-Van (right).

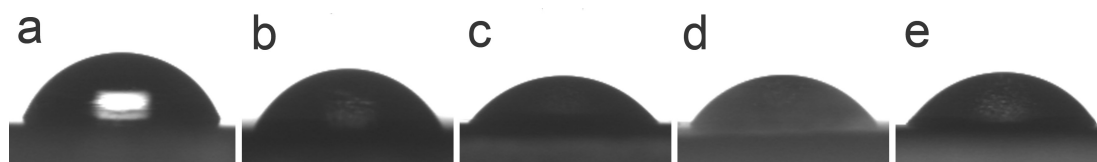

Fig. S5 Photographs of water droplets on different composite films: (a) Blank PMMA; (b) PMMA/ACPs; (c) PMMA/ACPs-Van/ACPs; (d) PMMA/ACPs-Tryp/ACPs; (e) PMMA/ACPs-Tryp/ACPs-Van.

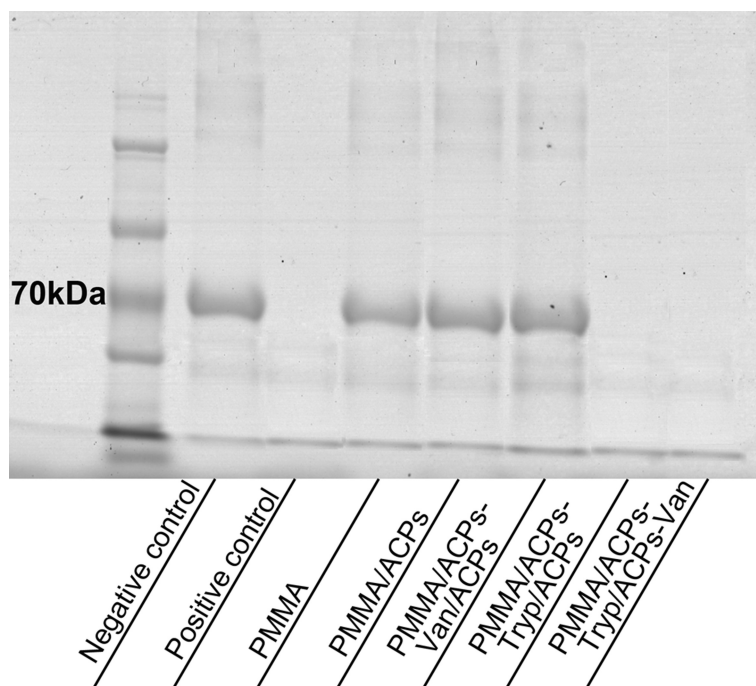

Fig. S6 SDS-PAGE of HSA after its incubation with different composite films at room temperature for 24 h.

Table S1. Water contact angle on different composite films.

| Films                | Blank<br>PMMA | PMMA/<br>ACPs | PMMA/ACPs-<br>Van/ACPs | PMMA/ACPs-<br>Tryp/ACPs | PMMA/ACPs-<br>Tryp/ACPs-Van |
|----------------------|---------------|---------------|------------------------|-------------------------|-----------------------------|
| Contact<br>angle (°) | 72.3±2.7      | 59.2±1.6      | 55.4±2.5               | 53.6±1.4                | 52.8±2.0                    |
